# Supplementary material
Source: publisher figshare collection journal article supplement (https://karger.figshare.com/ndownloader/files/23844116)
Supplement: Supplementary file 1 [file 23844116]

**Supplementary table 2**. Influence of the physiological determinants on the umbilical artery Doppler

|  |  | **Coefficient** | **S.E.** | **t value** | **p** |
| --- | --- | --- | --- | --- | --- |
| **5th centile** | **Constant** | 1.307 | 0.216 | 6.050 | <0.001 |
| **GA** | -0.026 | 0.014 | -1.865 | 0.063 |
| **GA2** | 0.00013 | 0.00023 | 0.536 | 0.592 |
| **BMI** | 0.006 | 0.003 | 2.311 | 0.021 |
| **Age** | -0.001 | 0.002 | -0.540 | 0.590 |
| **Nulliparity** | 0.033 | 0.022 | 1.488 | 0.137 |
| **Gender** | 0.009 | 0.017 | 0.532 | 0.595 |
| **10th centile** | **Constant** | 1.418 | 0.287 | 4.947 | <0.001 |
| **GA** | -0.022 | 0.017 | -1.275 | 0.203 |
| **GA2** | 0.00002 | 0.0003 | 0.085 | 0.932 |
| **BMI** | 0.002 | 0.003 | 0.909 | 0.364 |
| **Age** | -0.001 | 0.002 | -0.503 | 0.615 |
| **Nulliparity** | 0.005 | 0.022 | 0.211 | 0.833 |
| **Gender** | 0.020 | 0.020 | 1.037 | 0.300 |
| **50th centile** | **Constant** | 1.782 | 0.259 | 6.884 | <0.001 |
| **GA** | -0.033 | 0.016 | -2.043 | 0.042 |
| **GA2** | 0.0002 | 0.0003 | 0.676 | 0.499 |
| **BMI** | -0.001 | 0.002 | -0.660 | 0.509 |
| **Age** | 0.002 | 0.002 | 0.744 | 0.457 |
| **Nulliparity** | 0.010 | 0.018 | 0.546 | 0.586 |
| **Gender** | 0.068 | 0.020 | 3.300 | 0.001 |
| **90th centile** | **Constant** | 2.346 | 0.341 | 6.885 | <0.001 |
| **GA** | -0.050 | 0.025 | -1.984 | 0.048 |
| **GA2** | 0.0004 | 0.0004 | 0.997 | 0.319 |
| **BMI** | 0.003 | 0.004 | 0.696 | 0.487 |
| **Age** | -0.001 | 0.003 | -0.324 | 0.746 |
| **Nulliparity** | 0.013 | 0.034 | 0.389 | 0.698 |
| **Gender** | 0.033 | 0.030 | 1.115 | 0.265 |
| **95th centile** | **Constant** | 2.661 | 0.290 | 9.180 | <0.001 |
| **GA** | -0.067 | 0.021 | -3.162 | 0.002 |
| **GA2** | 0.001 | 0.0004 | 2.064 | 0.040 |
| **BMI** | 0.003 | 0.004 | 0.915 | 0.360 |
| **Age** | -0.002 | 0.004 | -0.414 | 0.679 |
| **Nulliparity** | -0.016 | 0.030 | -0.525 | 0.600 |
| **Gender** | -0.006 | 0.029 | -0.207 | 0.836 |
